# Supplementary material
Source: publisher figshare collection journal article supplement (https://gsajournals.figshare.com/articles/dataset/_/21984575)
Supplement: Supplementary file 1 [file 1]

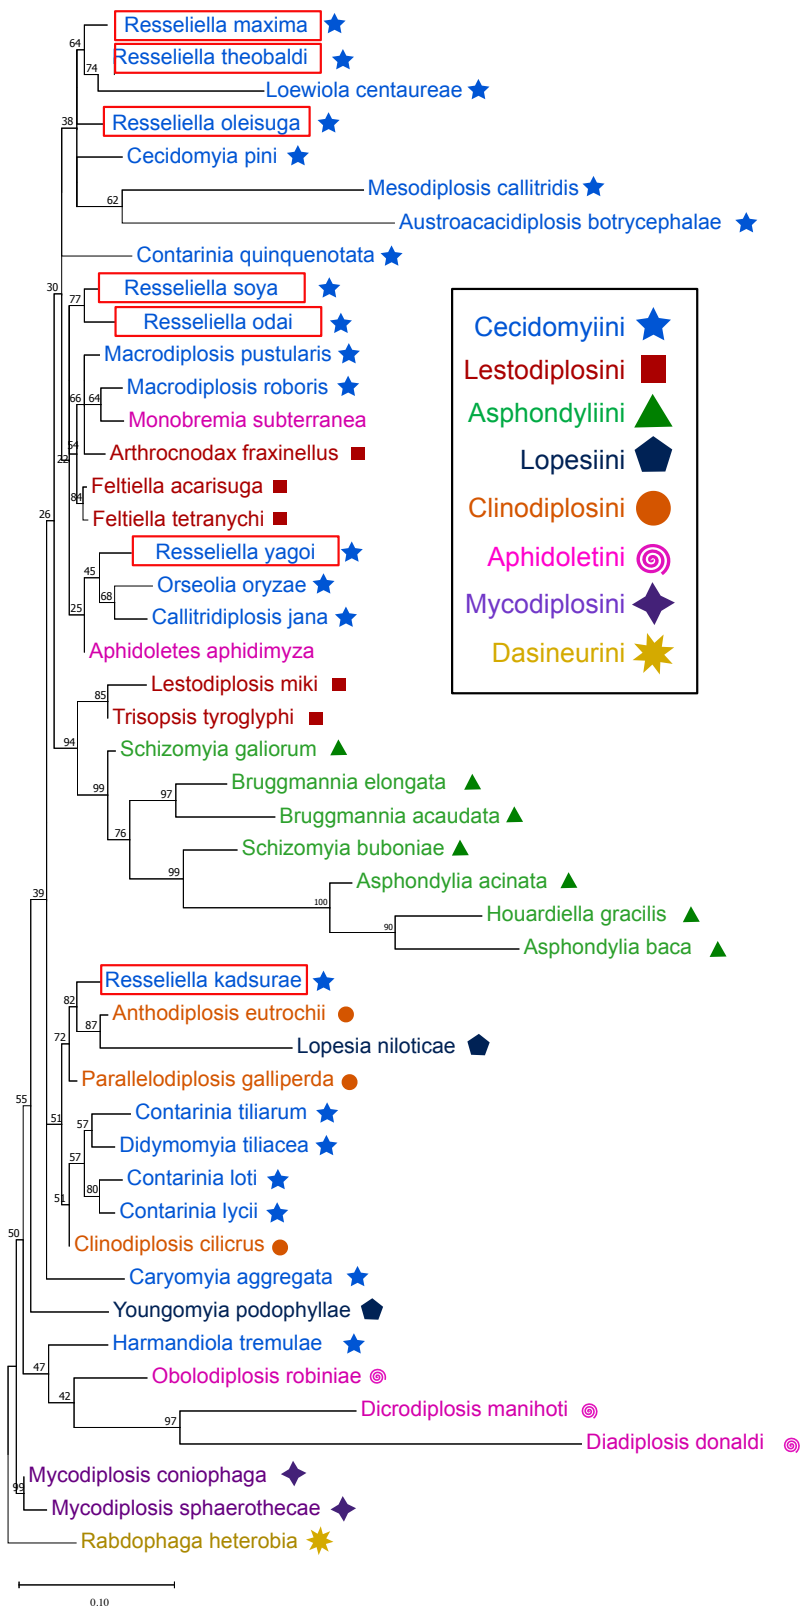

Figure. Maximum likelihood phylogenetic tree of Cecidomyiidae cytochrome oxidase I (COX1) sequences from NCBI. Node labels indicate bootstrap support. Red boxes indicate *Resseliella* species
